# Supplementary material for: Junctional and Actomyosin Dynamics Drive Endothelial Cell Rearrangements during Vascular Tube Formation
Source: Research Square preprint supplement (doi:10.21203/rs.3.rs-7065344/v1), 2025-07-18
Supplement: Supplementary file 1 [file a07ecd0a8c2fcdde941daa18.docx]

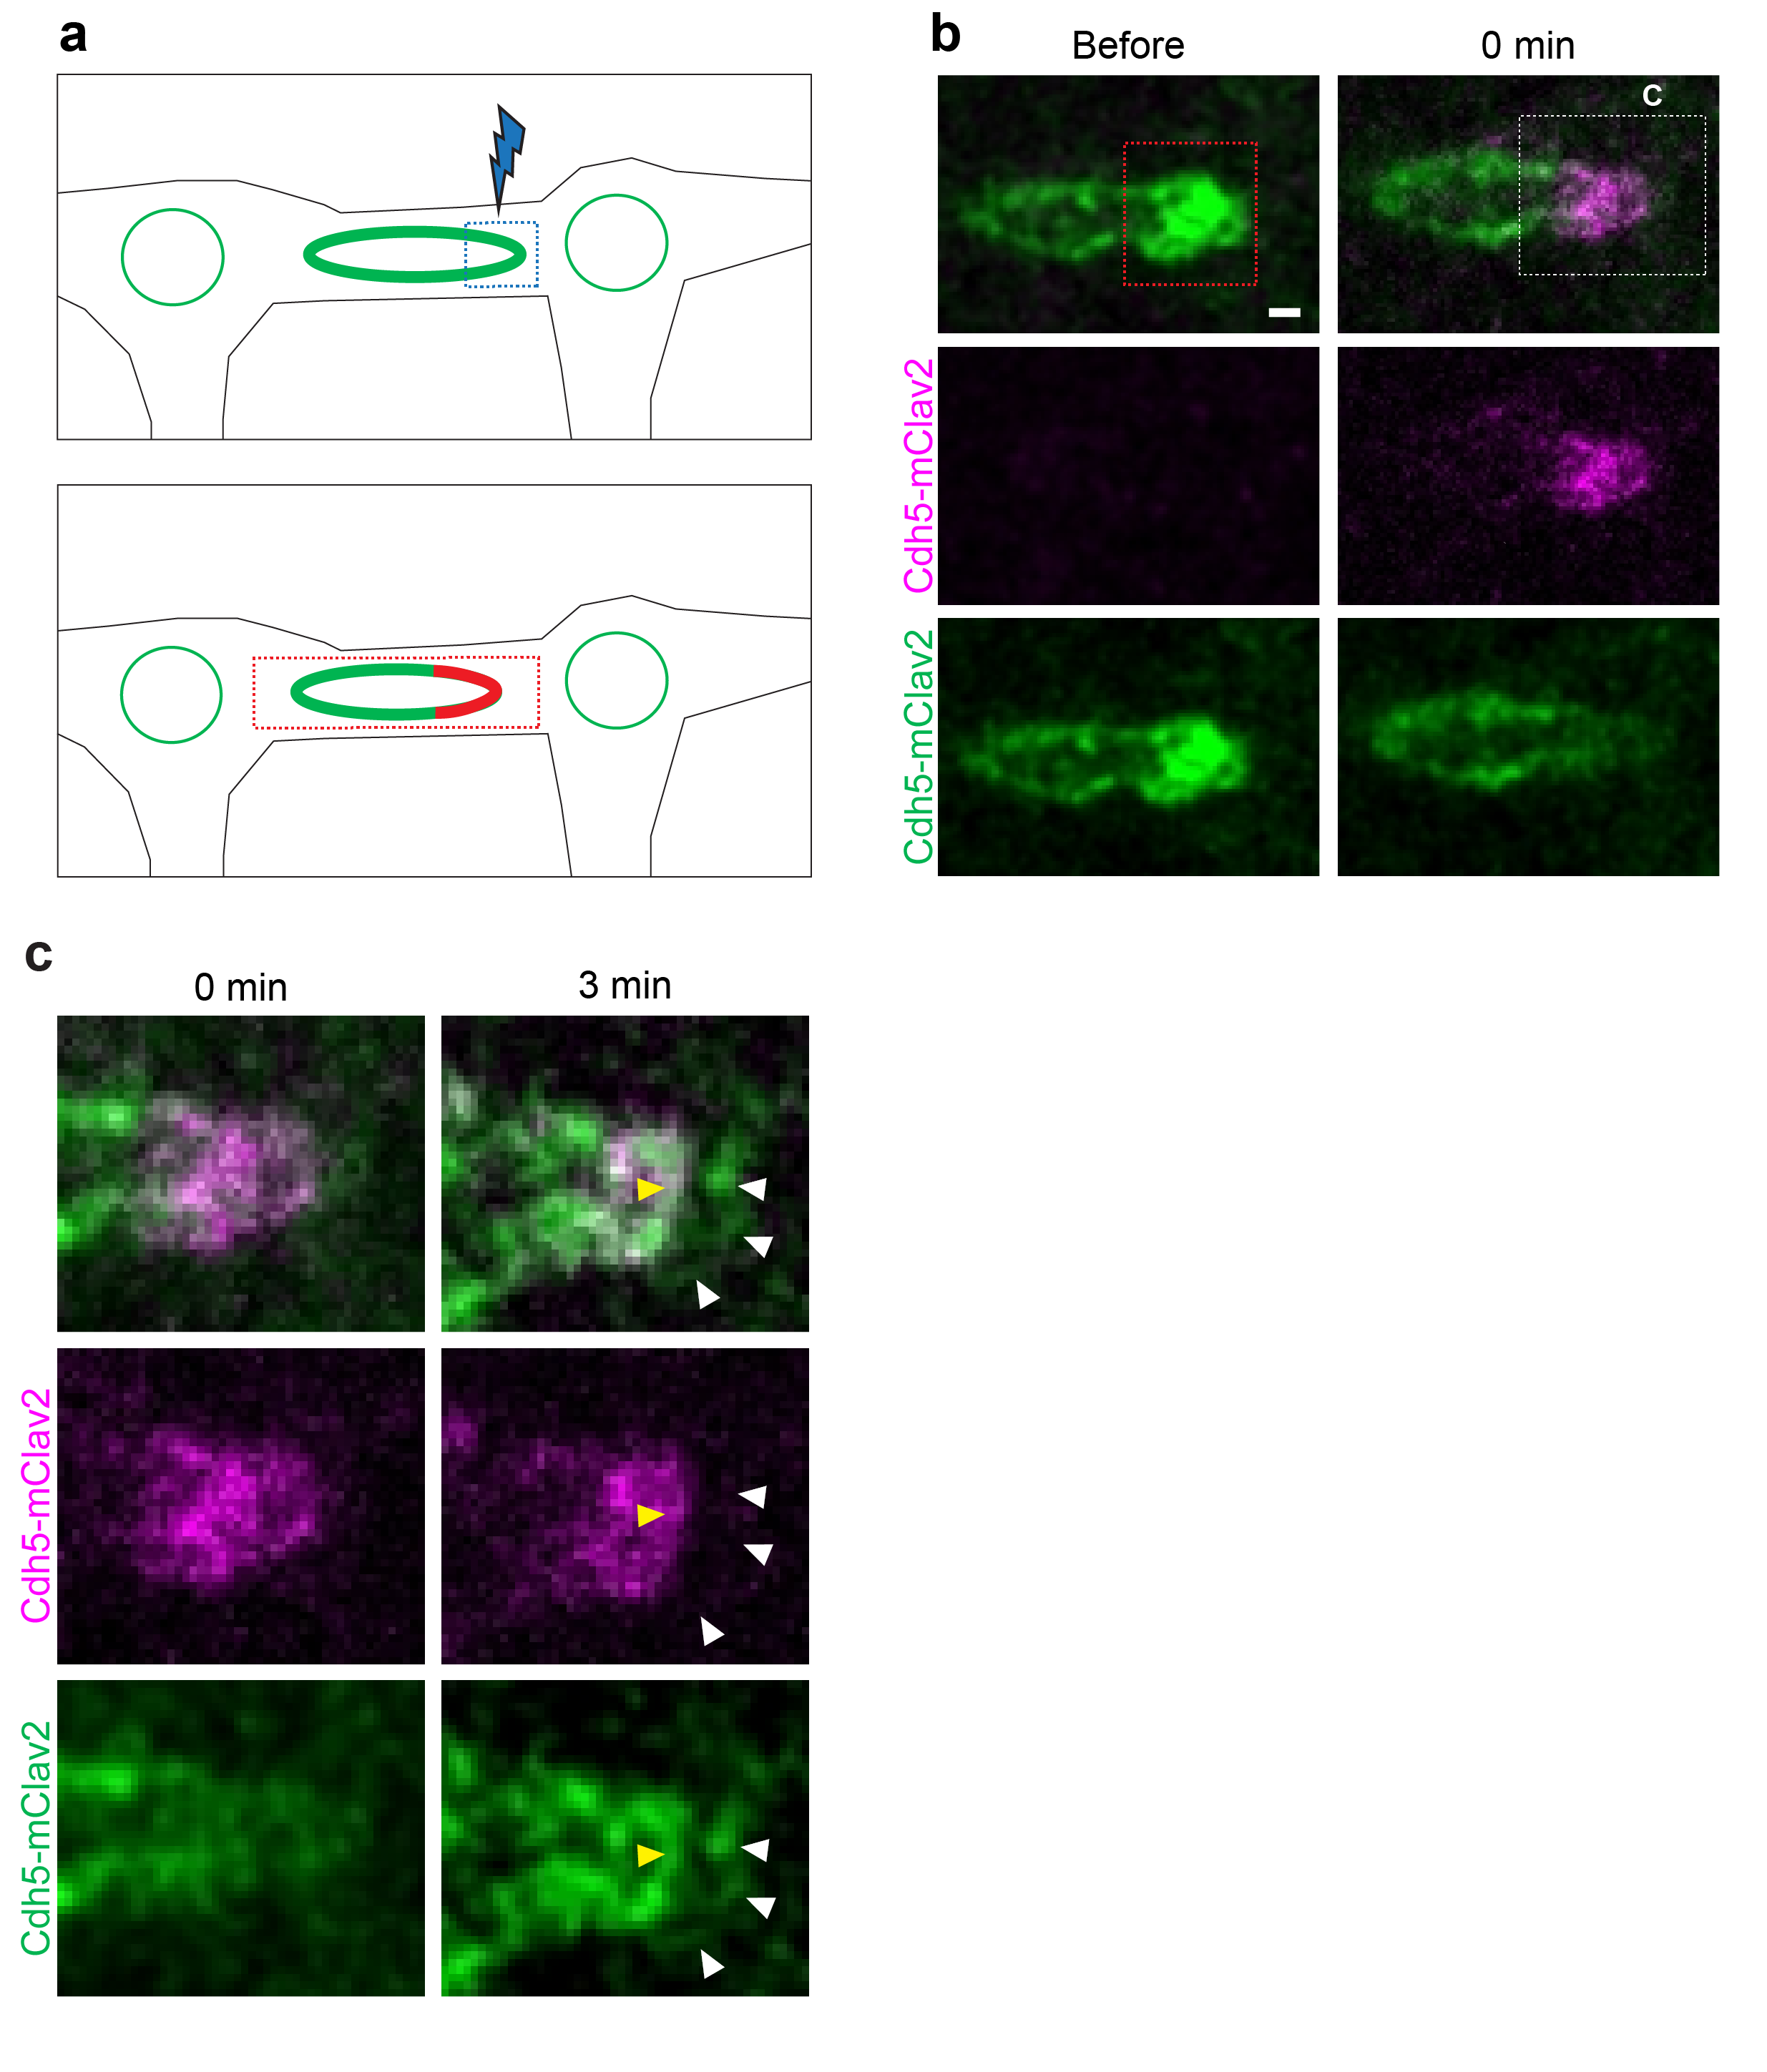


**Supplementary Figure 1: The distal junctions form *de novo***. **a:** Schematic representation of the experimental design. At first mClav2 labeled VE-cad is photoconverted in one pole of the junctional ring. Then time lapse imaging is performed on the half-converted ring. **b:** Time-lapse (Supplementary movie 7) of a DLAV junctional ring of an embryo expressing Cdh5-mClav2 before and right-after photoconversion. The red dashed square delimitates the photoconverted area. White dashed square demarcates the zoomed-in area of c. **c:** Time-lapse of the zoomed in junctional ring pole. right-after photoconversion and 4 min later. White and yellow arrowheads point distal and proximal junction respectively. Distal junction is labeled by green, non-photoconverted VE-cad; but not by red photoconverted VE-cad.

**
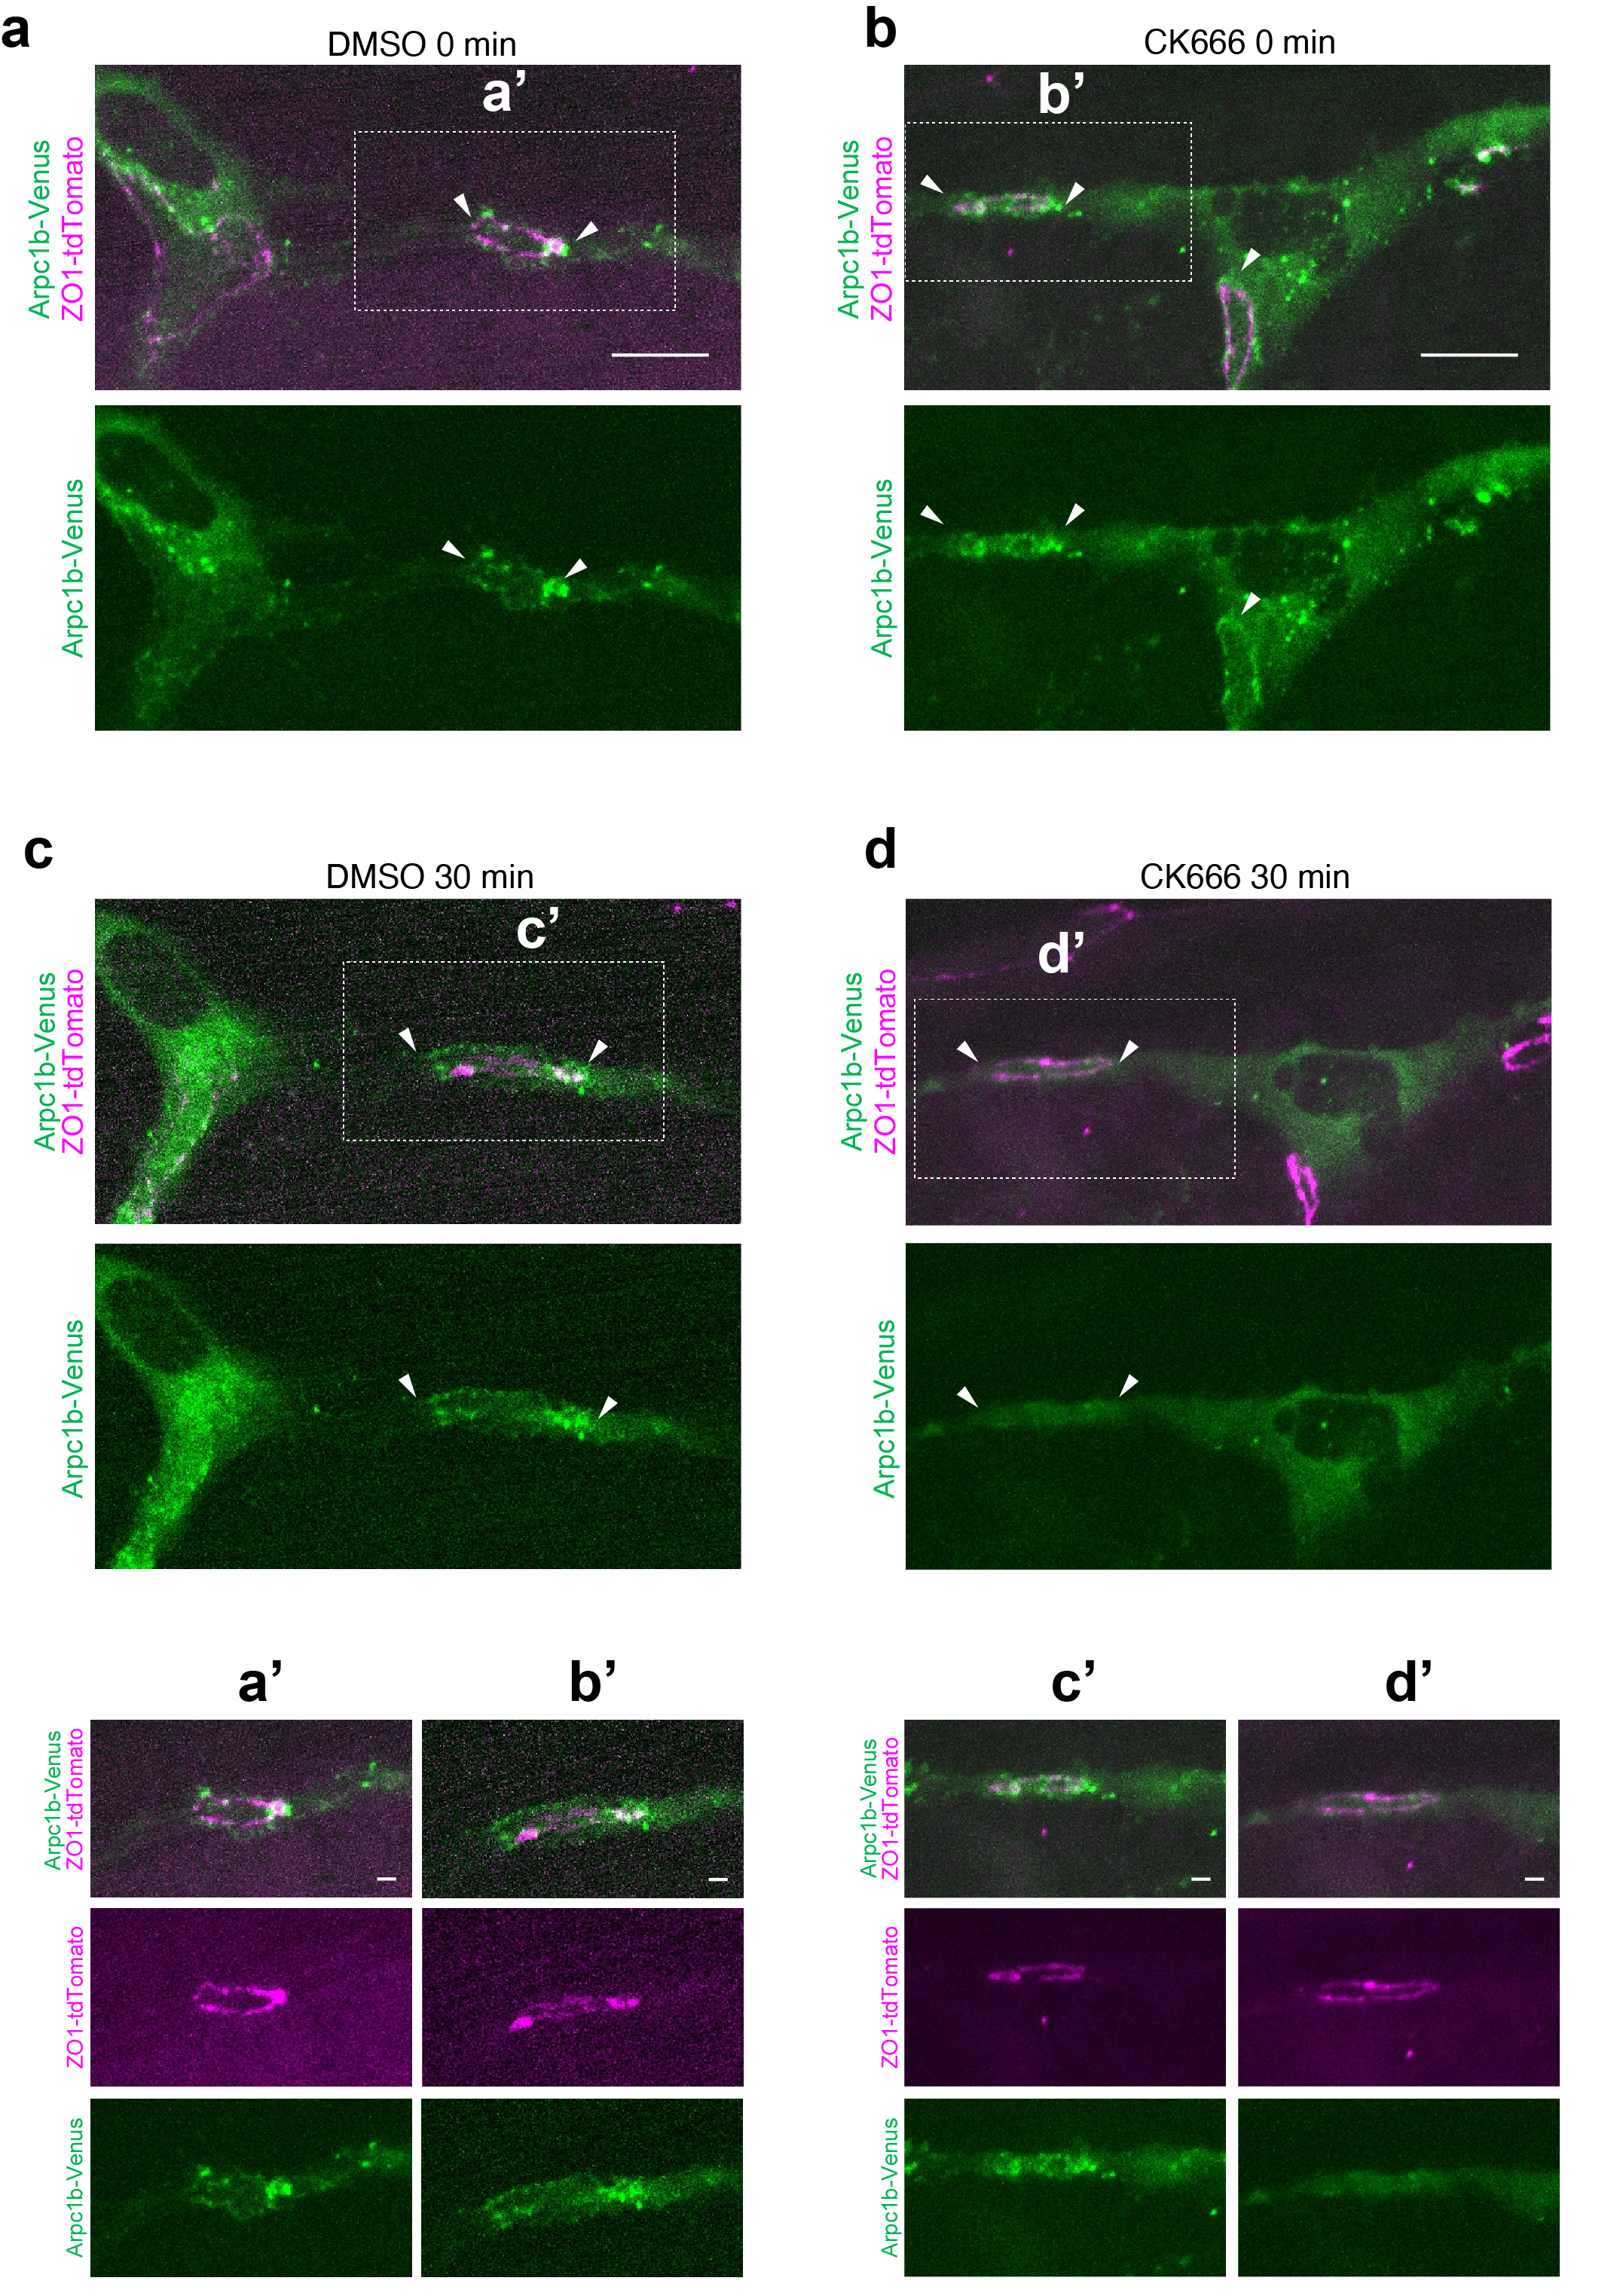
Supplementary Figure 2**: **CK666 disrupts Arp2/3 localization in DLAV anastomotic junctions.** Stills of Arpc1b-Venus and ZO1-td tomato before (**a**, **c**) and after 30 min treatment with DMSO 1% **c** (n=17) and CK666 200 µM **d**(n=25). T0 around 30 hpf n>20. White arrow heads are pointing at junctional poles. **a’, b’, c’, d’** are magnifications of the white dashed square delimited areas.


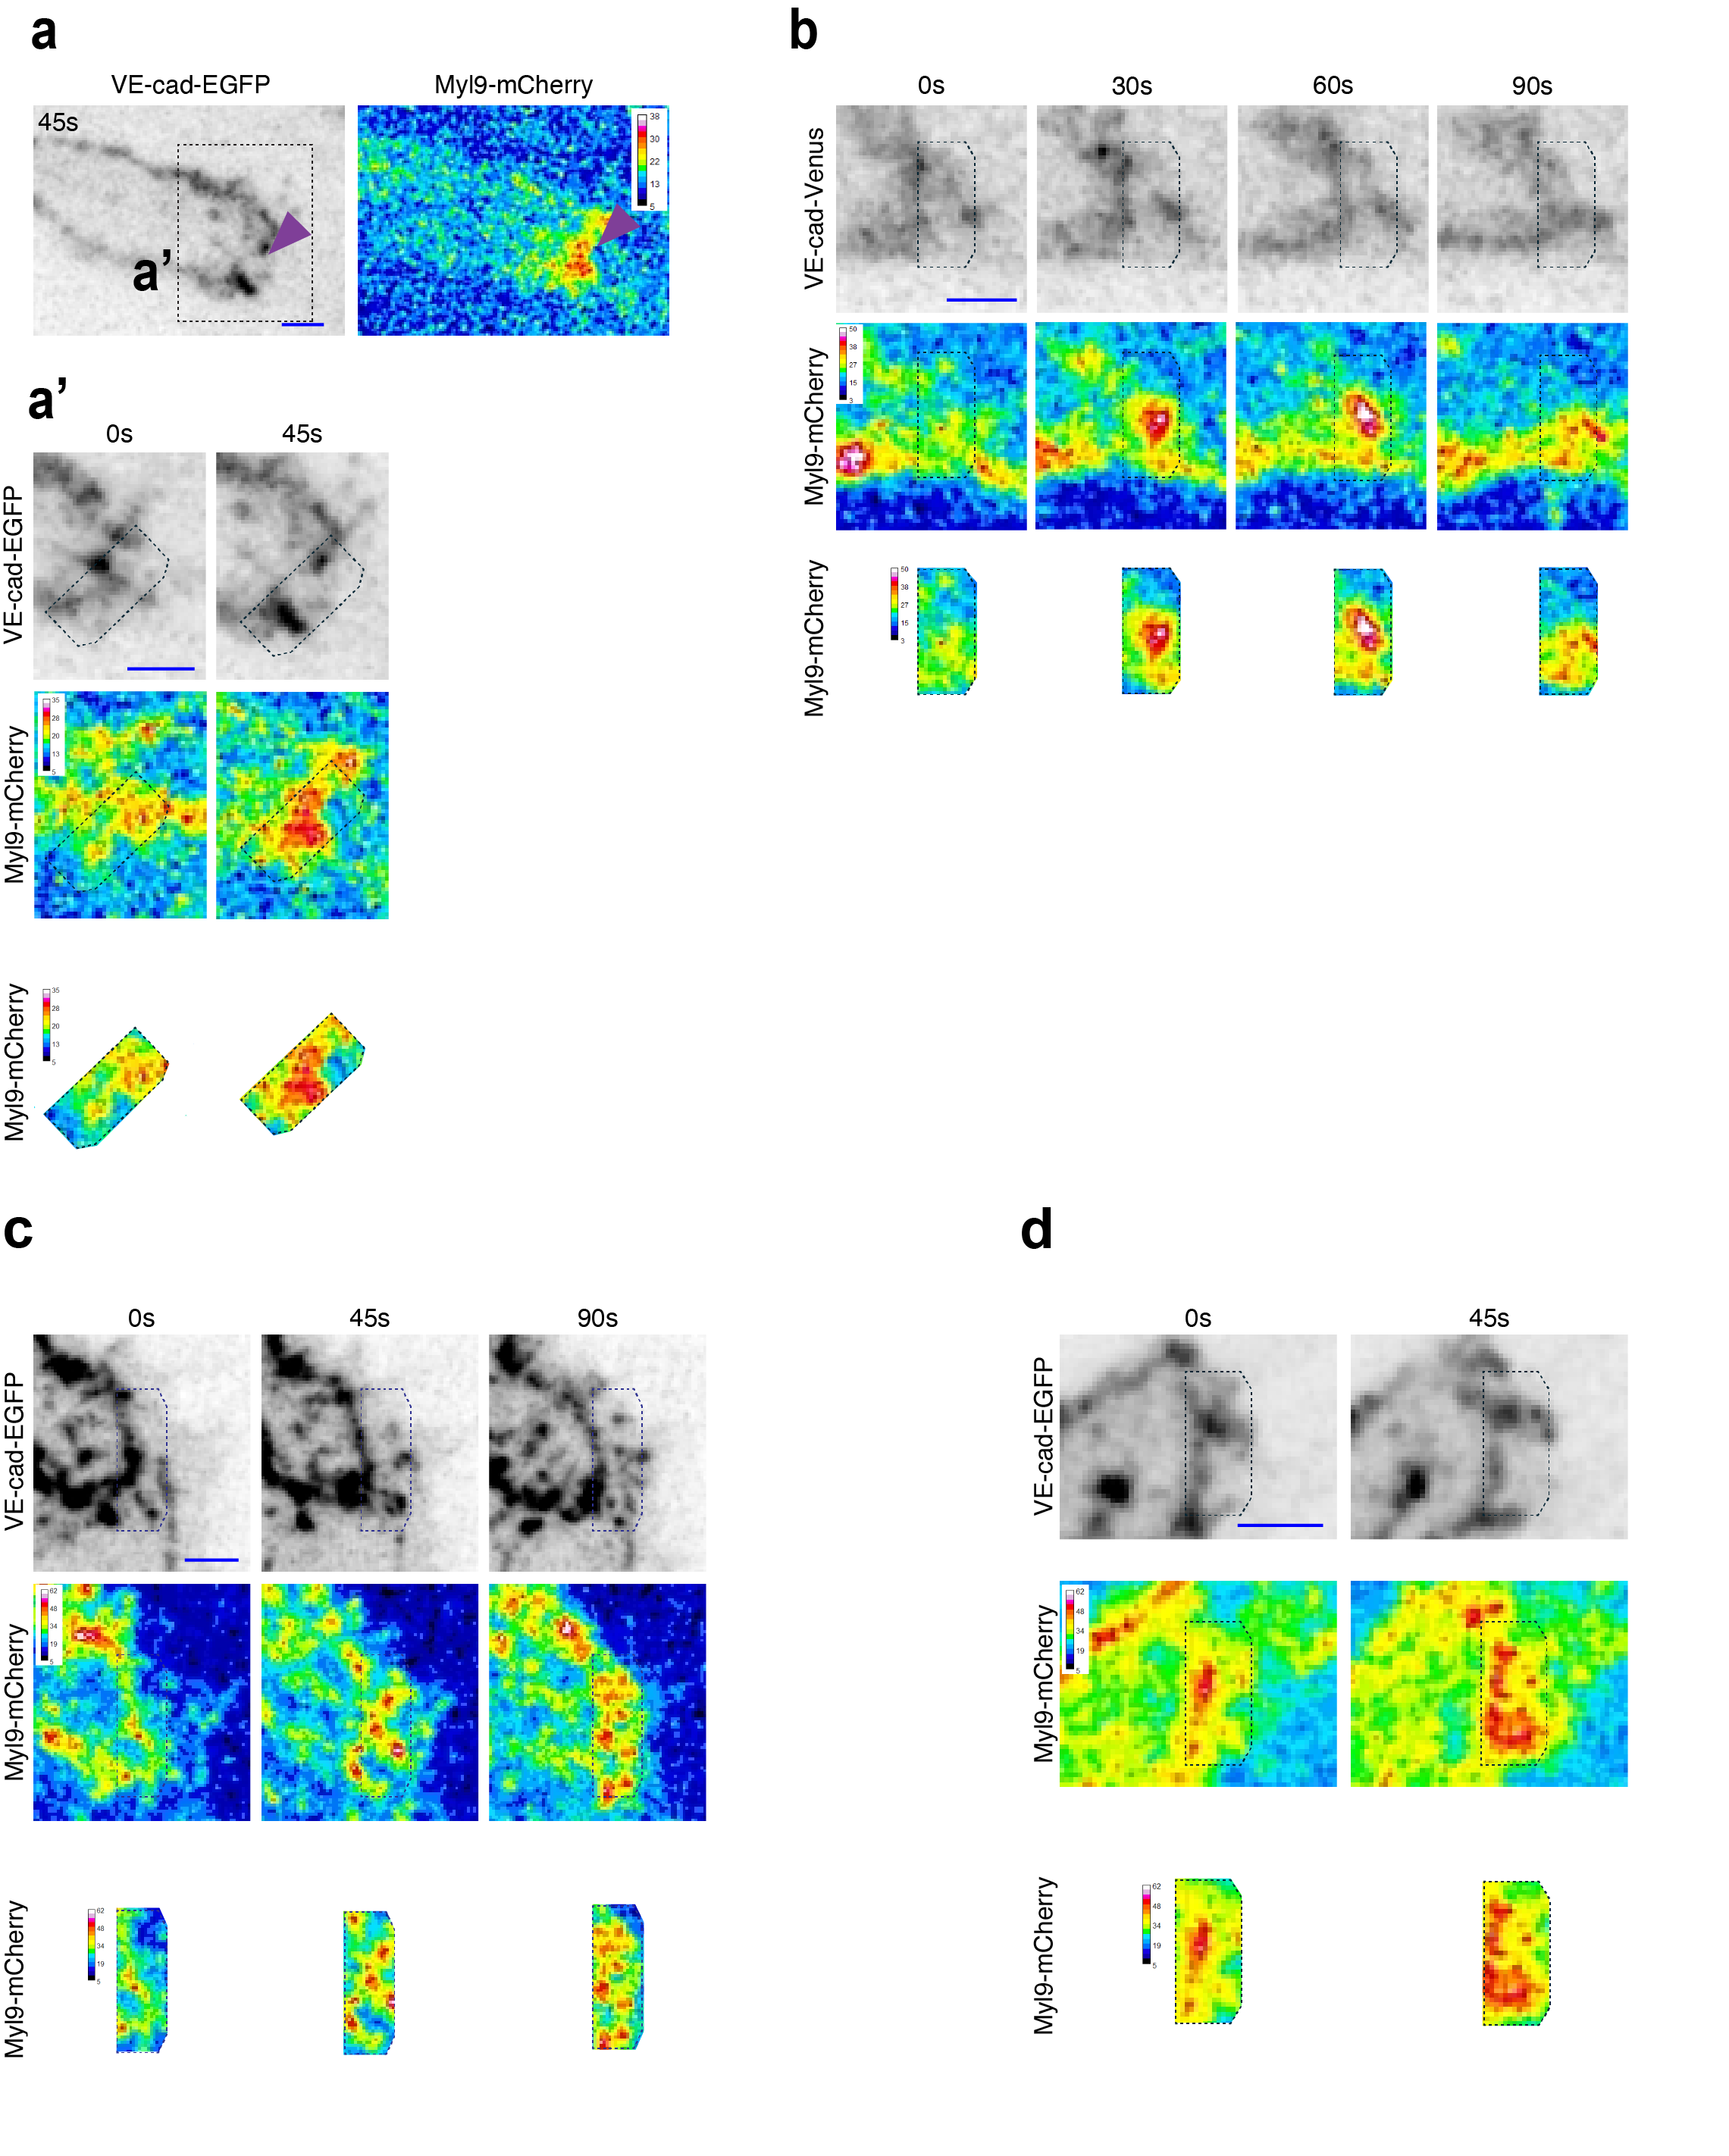


**Supplementary Figure 3**: **Myosin light-chain recruitment at the interjunctional space during merging.**

**a, a’:** Time-lapse of Cdh5ΔC-EGFP and Myl9b-mCherry during doble junction state (Supplementary movie 17). **a:** Still-image showingpolarized accumulation of MLC during ‘’double junction’’ state. **a’**: Still-images showing recruitment of MLC between proximal and distal junction. **b:** Still-images from a time-lapse (Supplementary movie 18) of VE-cad-Venus and Myl9b-mCherry showing increase of MLC in the junctional space prior to proximodistal junction mergence. **c, d:** Time-lapses of Cdh5ΔC-EGFP and Myl9b-mCherry (Supplementary movies 19, 20) showing recruitment of MLC between proximal and distal junction during ‘’double junction’’ state.
